# Supplementary material for: Medication use of Canadians with chronic obstructive pulmonary disease: a cohort study
Source: HighWire-hosted journal article supplement (doi:10.1136/bmjresp-2023-002083), 2023-12-01
Supplement: bmjresp-2023-002083supp001_data_supplement.pdf [file bmjresp-2023-002083supp001_data_supplement.pdf]

Supplementary Table 1. Diseases, and their associated codes and weights included in the Charlson Comorbidity Index.

| Disease                         | ICD-9-CM codes                                                       | ICD-10-CA codes                                                                                                                                                               | Weight |
|---------------------------------|----------------------------------------------------------------------|-------------------------------------------------------------------------------------------------------------------------------------------------------------------------------|--------|
| Myocardial infarction           | 410, 412                                                             | I21, I22, I25.2                                                                                                                                                               | 1      |
| Congestive heart failure        | 398, 402, 425, 428                                                   | I09.9, I11.0, I13.0, I13.2, I25.5, I42.0, I42.5, I42.6, I42.7, I42.8, I42.9, I43, I50, P29.0                                                                                  | 1      |
| Peripheral vascular disease     | 440, 441, 443, 447, 557                                              | I70, I71, I73.1, I73.8, I73.9, I77.1, I79.0, I79.2, K55.1, K55.8, K55.9, Z95.8, Z95.9                                                                                         | 1      |
| Cerebrovascular disease         | 430, 431, 432, 433, 434, 435, 436, 437, 438                          | G45, G46, I60, I61, I62, I63, I64, I65, I66, I67, I68, I69, H34.0                                                                                                             | 1      |
| Dementia                        | 290, 294, 331                                                        | F00, F01, F02, F03, G30, F05.1, G31.1                                                                                                                                         | 1      |
| Chronic pulmonary disease       | 416, 490, 491, 492, 493, 494, 495, 496, 500, 501, 502, 503, 504, 505 | J40, J41, J42, J43, J44, J45, J46, J47, J60, J61, J62, J63, J64, J65, J66, J67, I27.8, I27.9, J68.4, J70.1, J70.3                                                             | 1      |
| Connective tissue disease       | 446, 710, 714, 725                                                   | M05, M32, M33, M34, M06, M31.5, M35.1, M35.3, M36.0                                                                                                                           | 1      |
| Peptic ulcer disease            | 531, 532, 533, 534                                                   | K25, K26, K27, K28                                                                                                                                                            | 1      |
| Mild liver disease              | 070, 570, 571, 573                                                   | B18, K73, K74, K70.0, K70.1, K70.2, K70.3, K70.9, K71.7, K71.3, K71.4, K71.5, K76.0, K76.2, K76.3, K76.4, K76.8, K76.9, Z94.4                                                 | 1      |
| Moderate/severe liver disease   | 456, 572                                                             | K70.4, K71.1, K72.1, K72.9, K76.5, K76.6, K76.7, I85.0, I85.9, I86.4, I98.2                                                                                                   | 3      |
| Diabetes (without complication) | 250                                                                  | E10.0, E10.1, E10.6, E10.8, E10.9, E11.0, E11.1, E11.6, E11.8, E11.9, E12.0, E12.1, E12.6, E12.8, E12.9, E13.0, E13.1, E13.6, E13.8, E13.9, E14.0, E14.1, E14.6, E14.8, E14.9 | 1      |
| Diabetes (with complication)    | 250                                                                  | E10.2, E10.3, E10.4, E10.5, E10.7, E11.2, E11.3, E11.4, E11.5, E11.7, E12.2, E12.3, E12.4, E12.5, E12.7, E13.2, E13.3, E13.4, E13.5, E13.7, E14.2, E14.3, E14.4, E14.5, E14.7 | 2      |

| Disease                          | ICD-9-CM codes                                   | ICD-10-CA codes                                                                                                                                      | Weight |
|----------------------------------|--------------------------------------------------|------------------------------------------------------------------------------------------------------------------------------------------------------|--------|
| Hemiplegia and paraplegia        | 334, 342, 343, 344                               | G81, G82, G04.1, G11.4, G80.1, G80.2, G83.0, G83.1, G83.2, G83.3, G83.4, G83.9                                                                       | 2      |
| Moderate or severe renal disease | 403, 582, 583, 585, 586, 588, V56                | N18, N19, N05.2, N05.3, N05.4, N05.5, N05.6, N05.7, N25.0, I12.0, I13.1, N03.2, N03.3, N03.4, N03.5, N03.6, N03.7, Z49.0, Z49.1, Z49.2, Z94.0, Z99.2 | 2      |
| Cancer                           | 140-165, 170-172, 174-176, 179-195, 200-208, 238 | C00-C26, C30-C34, C37-C41, C43, C45-C58, C60-C76, C81-C85, C88, C90- C97                                                                             | 2      |
| Metastatic Carcinoma             | 196, 197, 198, 199                               | C77, C78, C79, C80                                                                                                                                   | 6      |
| HIV/AIDS                         | 042, 043, 044                                    | B20, B21, B22, B24                                                                                                                                   | 6      |

To be considered as having one of the listed diseases, an individual must have had  $\geq 1$  hospitalization (associated ICD-10-CA code listed in any diagnostic field) or  $\geq 2$  physician claims (associated ICD-9-CM codes listed in any diagnostic field) of the corresponding ICD within  $\leq 2$ -years. Abbreviations: HIV/AIDS = Human immunodeficiency virus / acquired immunodeficiency syndrome; ICD-9-CM = International classification of diseases, ninth revision, clinical modification; ICD-10-CA = International classification of diseases, tenth revision, Canadian enhancement.

Supplementary Table 2. Drugs included in the COPD medication classes and those used to define acute exacerbations of COPD (AECOPD).

| COPD medications                                                           | Active ingredient(s)                                         | ATC classification |
|----------------------------------------------------------------------------|--------------------------------------------------------------|--------------------|
| <i>COPD treatment medications</i>                                          |                                                              |                    |
| SABA                                                                       | Salbutamol                                                   | R03AC02            |
|                                                                            | Terbutaline sulfate                                          | R03AC03            |
|                                                                            | Fenoterol hydrobromide                                       | R03AC04            |
| SAMA                                                                       | Ipratropium bromide                                          | R03BB01            |
| SABA / SAMA                                                                | Fenoterol hydrobromide / Ipratropium bromide                 | R03AL01            |
|                                                                            | Salbutamol / Ipratropium bromide                             | R03AL02            |
| LABA                                                                       | Salmeterol                                                   | R03AC12            |
|                                                                            | Formoterol                                                   | R03AC13            |
|                                                                            | Indacaterol                                                  | R03AC18            |
| LAMA                                                                       | Tiotropium                                                   | R03BB04            |
|                                                                            | Acclidinium bromide                                          | R03BB05            |
|                                                                            | Glycopyrronium bromide                                       | R03BB06            |
|                                                                            | Umeclidinium bromide                                         | R03BB07            |
| LABA / LAMA                                                                | Vilanterol / Umeclidinium                                    | R03AL03            |
|                                                                            | Indacaterol / Glycopyrronium                                 | R03AL04            |
|                                                                            | Formoterol / Acclidinium                                     | R03AL05            |
|                                                                            | Olodaterol / Tiotropium                                      | R03AL06            |
| ICS                                                                        | Fluticasone furoate                                          | R01AD12            |
|                                                                            | Beclomethasone dipropionate                                  | R03BA01            |
|                                                                            | Budesonide                                                   | R03BA02            |
|                                                                            | Fluticasone propionate                                       | R03BA05            |
|                                                                            | Mometasone furoate                                           | R03BA07            |
|                                                                            | Ciclesonide                                                  | R03BA08            |
| ICS / LABA                                                                 | Fluticasone / Salmeterol                                     | R03AK06            |
|                                                                            | Budesonide / Formoterol                                      | R03AK07            |
|                                                                            | Mometasone / Formoterol                                      | R03AK09            |
|                                                                            | Fluticasone / Vilanterol                                     | R03AK10            |
| ICS / LABA / LAMA                                                          | Fluticasone / Vilanterol / Umeclidinium                      | R03AL08            |
| Methylxanthines                                                            | Theophylline                                                 | R03DA04            |
|                                                                            | Aminophylline                                                | R03DA05            |
|                                                                            | Oxtriphylline / Guaifenesin                                  | R03DA54            |
| PDE-4 inhibitors                                                           | Roflumilast                                                  | R03DX07            |
| Antibiotics                                                                | Azithromycin (long-term use: >21 consecutive days of supply) | J01FA10            |
| <i>AECOPD medications (short-term use; ≤21 consecutive days of supply)</i> |                                                              |                    |
| Oral corticosteroids                                                       | Prednisone                                                   | H02AB07            |
| Antibiotics                                                                | All antibiotics for systemic use                             | J01                |

Abbreviations: ATC - anatomical therapeutic chemical; COPD - chronic obstructive pulmonary disease; ICS - inhaled corticosteroid; LABA - long-acting beta<sub>2</sub> agonist; LAMA - long-acting muscarinic antagonists; PDE-4 - phosphodiesterase-4; SABA - short-acting beta<sub>2</sub> agonist; SAMA - short-acting muscarinic antagonists; AECOPD – acute exacerbations of COPD.

Supplementary Table 3. Characteristics of those who received ancillary medication classes at baseline.

|                            | Baseline COPD medication class |      |                         |      |                  |      |
|----------------------------|--------------------------------|------|-------------------------|------|------------------|------|
|                            | ICS                            |      |                         |      | Other            |      |
|                            | ICS only                       |      | ICS + Other and/or SABD |      | (+/- SABD)       |      |
|                            | N                              | (%)  | N                       | (%)  | N                | (%)  |
| Cohort size                | 1,608                          | 0.8  | 4,001                   | 2.1  | 231              | 0.1  |
| <i>Demographics</i>        |                                |      |                         |      |                  |      |
| Age, years                 |                                |      |                         |      |                  |      |
| Age, median (IQR)          | 66 (57 - 75)                   |      | 64 (56 - 75)            |      | 65 (59 - 71)     |      |
| Category                   |                                |      |                         |      |                  |      |
| 35-44                      | 47                             | 2.9  | 152                     | 3.8  | <10              | N/A  |
| 45-54                      | 248                            | 15.4 | 702                     | 17.6 | 27               | 11.7 |
| 55-64                      | 448                            | 27.9 | 1,187                   | 29.7 | 82               | 35.5 |
| 65-74                      | 442                            | 27.5 | 943                     | 23.6 | 77               | 33.3 |
| 75-84                      | 283                            | 17.6 | 697                     | 17.4 | 35               | 15.2 |
| 85+                        | 140                            | 8.7  | 320                     | 8.0  | <10              | N/A  |
| Sex                        |                                |      |                         |      |                  |      |
| Male                       | 839                            | 52.2 | 2,366                   | 59.1 | 118              | 51.1 |
| Female                     | 769                            | 47.8 | 1,635                   | 40.9 | 113              | 48.9 |
| Residence                  |                                |      |                         |      |                  |      |
| Urban                      | 1,315                          | 81.8 | 2,792                   | 69.8 | 174              | 75.3 |
| Rural                      | 293                            | 18.2 | 1,209                   | 30.2 | 57               | 24.7 |
| <i>Clinical</i>            |                                |      |                         |      |                  |      |
| Years living with COPD     |                                |      |                         |      |                  |      |
| Years, median (IQR)        | 6.8 (3.4 - 10.2)               |      | 6.9 (3.6 - 11.0)        |      | 9.7 (5.4 - 14.1) |      |
| Category                   |                                |      |                         |      |                  |      |
| 1 - 5                      | 608                            | 37.8 | 1,437                   | 35.9 | 47               | 20.3 |
| >5 - 10                    | 575                            | 35.8 | 1,359                   | 34.0 | 73               | 31.6 |
| >10 - 15                   | 353                            | 22.0 | 977                     | 24.4 | 73               | 31.6 |
| >15                        | 72                             | 4.5  | 228                     | 5.7  | 38               | 16.5 |
| Charlson Comorbidity Index |                                |      |                         |      |                  |      |
| Score, median (IQR)        | 1 (0 - 1)                      |      | 1 (1 - 2)               |      | 2 (1 - 3)        |      |
| Category                   |                                |      |                         |      |                  |      |
| 0                          | 668                            | 41.5 | 882                     | 22.0 | 35               | 15.2 |
| 1-2                        | 749                            | 46.6 | 2,366                   | 59.1 | 128              | 55.4 |
| 3-4                        | 129                            | 8.0  | 471                     | 11.8 | 47               | 20.4 |
| ≥5                         | 62                             | 3.9  | 282                     | 7.1  | 21               | 9.1  |

Abbreviations: COPD - chronic obstructive pulmonary disease; ICS - inhaled corticosteroid; IQR - interquartile range; LABA - long-acting beta<sub>2</sub> agonist; LAMA - long-acting muscarinic antagonists; N/A - not applicable; SABD - short-acting bronchodilator.

Supplementary Table 4. Medication use, treatment patterns, and adherence during the 1-year post-index period among those who received ancillary medication classes.

|                                                                                   | Baseline COPD medication class |       |                         |       |            |       |
|-----------------------------------------------------------------------------------|--------------------------------|-------|-------------------------|-------|------------|-------|
|                                                                                   | ICS                            |       |                         |       | Other      |       |
|                                                                                   | ICS only                       |       | ICS + Other and/or SABD |       | (+/- SABD) |       |
|                                                                                   | N                              | (%)   | N                       | (%)   | N          | (%)   |
| Cohort size                                                                       | 1,608                          | 0.8   | 4,001                   | 2.1   | 231        | 0.1   |
| <i>COPD-related Medication use</i>                                                |                                |       |                         |       |            |       |
| Received $\geq 1$ dispensation during the observation period:                     |                                |       |                         |       |            |       |
| Overall                                                                           | 1,293                          | 80.4  | 3,745                   | 93.6  | 219        | 94.8  |
| $\geq 1$ additional medication class                                              | 504                            | 31.3  | 1,050                   | 26.2  | 75         | 32.5  |
| <i>Adherence to baseline medication class</i>                                     |                                |       |                         |       |            |       |
| All drug component(s)                                                             | 333                            | 27.3  | 1,015                   | 29.2  | 121        | 56.8  |
| $\geq 1$ drug component                                                           | 333                            | 27.3  | 1,276                   | 36.8  | 121        | 56.8  |
| <i>Treatment patterns</i>                                                         |                                |       |                         |       |            |       |
| Discontinuation of baseline medication                                            | 1,171                          | 72.82 | 2,567                   | 64.16 | 107        | 46.32 |
| Switch from baseline medication                                                   | 70                             | 4.35  | 789                     | 19.72 | 18         | 7.79  |
| Among those who received $\geq 1$ dispensation for an additional medication class |                                |       |                         |       |            |       |
| Guideline-concordant step-up                                                      | N/A                            | N/A   | N/A                     | N/A   | N/A        | N/A   |

Abbreviations: COPD - chronic obstructive pulmonary disease; ICS - inhaled corticosteroid; LABA - long-acting beta<sub>2</sub> agonist; LAMA - long-acting muscarinic antagonists; N/A - not applicable; SABD - short-acting bronchodilator.

Supplementary Table 5. AECOPD during the 1-year post-index period among those who received ancillary medication classes.

|                      | Baseline COPD medication class |      |                            |      |            |      |
|----------------------|--------------------------------|------|----------------------------|------|------------|------|
|                      | ICS                            |      |                            |      | Other      |      |
|                      | ICS only                       |      | ICS + Other<br>and/or SABD |      | (+/- SABD) |      |
|                      | N                              | (%)  | N                          | (%)  | N          | (%)  |
| Cohort size          | 1,608                          | 0.8  | 4,001                      | 2.1  | 231        | 0.1  |
| <i>Had ≥1 AECOPD</i> |                                |      |                            |      |            |      |
| Overall              | 76                             | 4.7  | 743                        | 18.6 | 33         | 14.3 |
| Severe               | 31                             | 40.8 | 404                        | 54.4 | 23         | 69.7 |
| Moderate             | 54                             | 71.1 | 489                        | 65.8 | 19         | 57.6 |

Abbreviations: AECOPD – acute exacerbations of COPD; COPD - chronic obstructive pulmonary disease; SABD - short-acting bronchodilator.
